# Supplementary material
Source: Springer Nature journal article supplement (https://www.springermedizin.de/resource/supplementary/12877_2013_945_MOESM2_ESM.pdf/9440828)

# A chart to show patient waiting times in the Memory Service

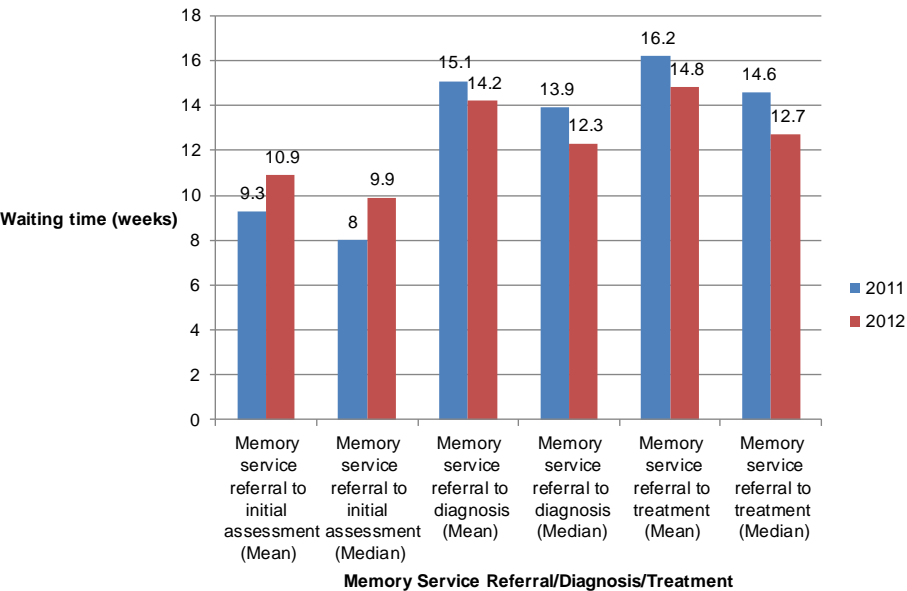

Supplement: MOESM2 [file 9440828]
